# Supplementary material
Source: PubMed Central journal article supplement (PMC3457317)
Supplement: JVI.00176-12_zjv999096597so1.pdf [file JVI.00176-12_zjv999096597so1.pdf]

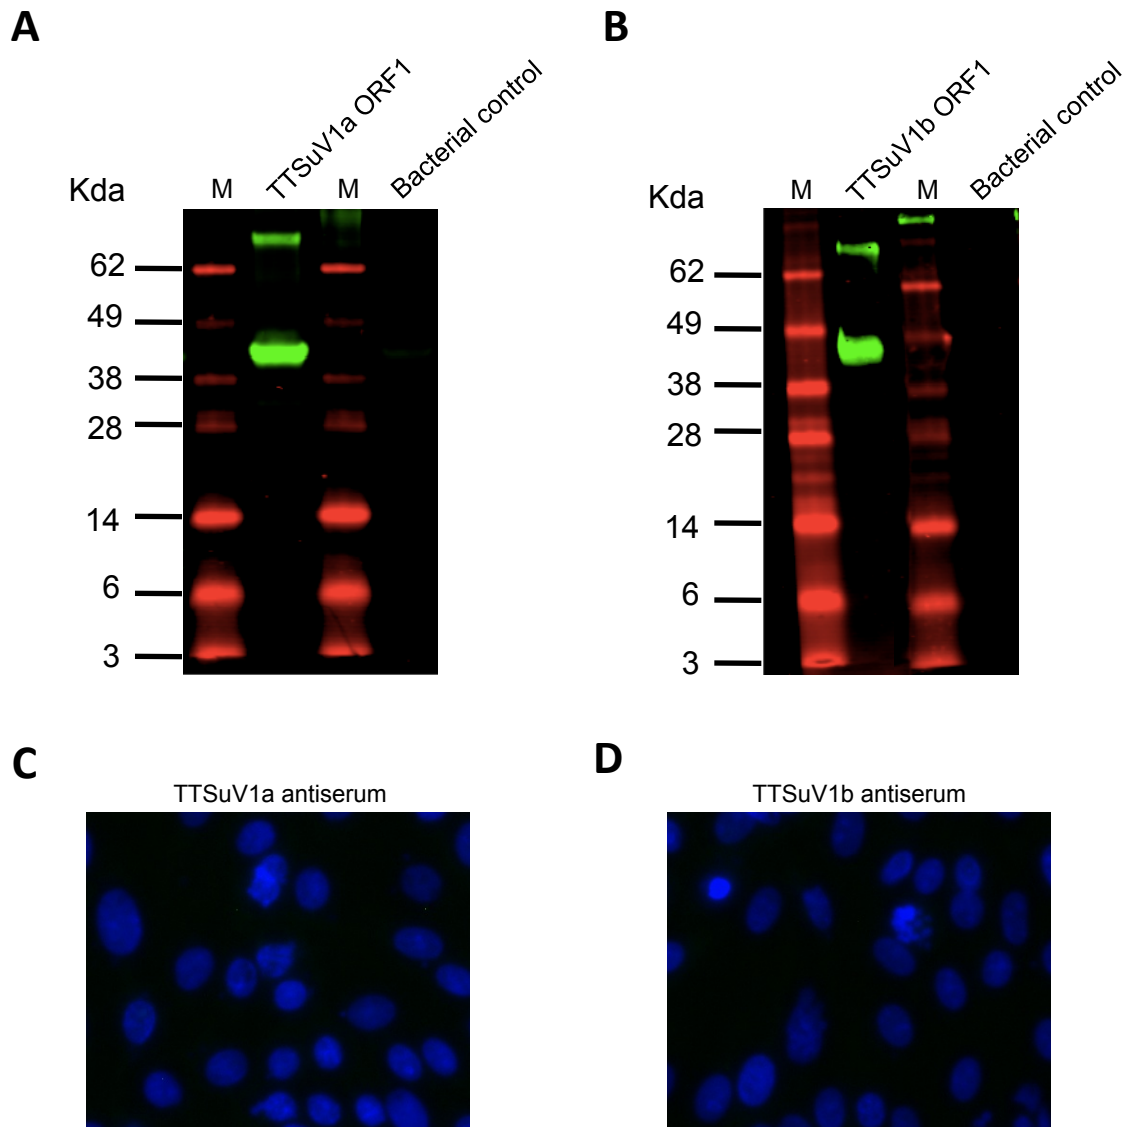

**Figure S1. Demonstration of the specificity of TTSuV1a or TTSuV1b ORF1 antiserum by WB and IFA analysis. (A)** WB analysis of the TTSuV1a ORF1 antigen and the bacterial control (cell lysis product from bacteria harboring the empty expression vector, pTriEx1.1 Neo) using the anti-TTSuV1a ORF1 antiserum. **(B)** WB analysis of the TTSuV1b ORF1 antigen and the bacterial control using the anti-TTSuV1b ORF1 antiserum. **(C & D)** IFA results of PK-15 cells transfected with the pTriEx1.1 Neo vector used to express the TTSuV ORF1s. Cells were stained with the anti-TTSuV1a **(C)** or -TTSuV1b **(D)** antiserum and an Alexa fluor 488-conjugated goat anti-rabbit IgG at 3 days post-transfection. DAPI was used to stain the cell nucleus. Merges of antiserum and DAPI stainings are shown. Magnification = 200 $\times$ . Results indicated that the negative controls (the bacterial control and the expression vector) were all negative when stained with the two antisera, respectively.

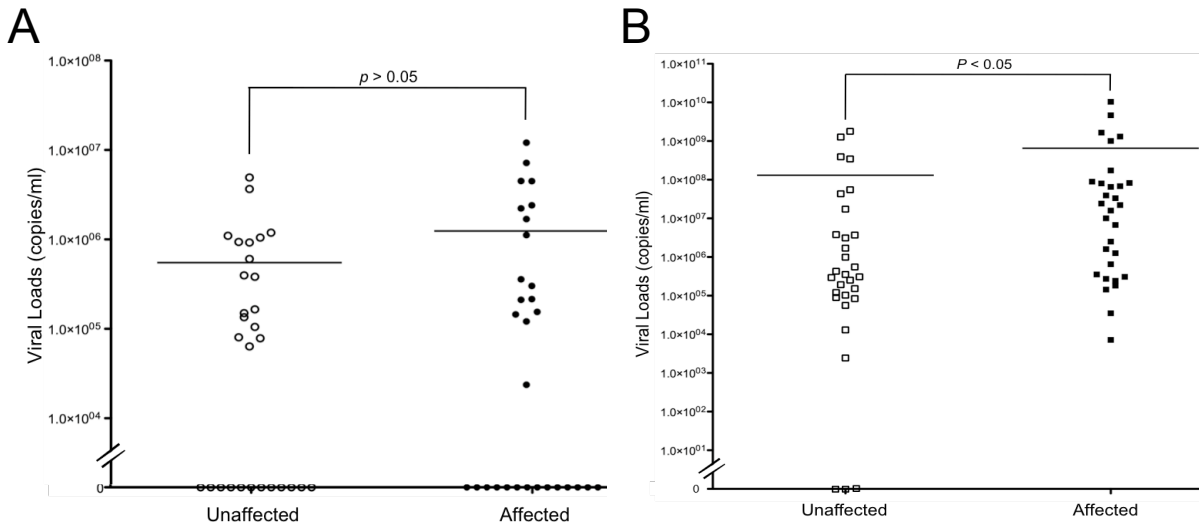

**Figure S2. Box plots showing the comparisons of TTSuV1 (A) or PCV2 (B) viral loads between the PCVAD-affected and -unaffected pigs.**
